# Supplementary material for: Prevalence of Infectious Spleen and Kidney Necrosis Virus (ISKNV), Nervous Necrosis Virus (NNV) and Ectoparasites in Juvenile Epinephelus spp. Farmed in Aceh, Indonesia
Source: MDPI journal article supplement (doi:10.3390/pathogens9070578), 2020-07-16
Supplement: s1 [file s1]

Supplemental Table S1. Summary of the gross pathological changes observed and the scoring code for the statistical analysis. A score of '0' was considered normal for all descriptors.

| <b>Description (scoring code)</b>              | <b>Description (scoring code)</b>              |
|------------------------------------------------|------------------------------------------------|
| Fin: frayed, eroded or haemorrhage (1)         | Liver colour: dark (1); pale (2); two-tone (3) |
| Body surface: lesion or pale (1)               | Liver size: reduced (1); enlarged (2)          |
| Eyes: cataract or haemorrhage (1)              | Spleen colour: dark (1); pale (2)              |
| Gills: pale (1); haemorrhagic (2)              | Spleen size: reduced (1); enlarged (2)         |
| Body cavity: ascites (1)                       | Anterior kidney colour: pale (1)               |
| Gall bladder: distended or over full (1)       | Anterior kidney size: enlarged (1)             |
| Swim bladder: distended (1)                    | Posterior kidney: dark (1); pale (2)           |
| Adipose tissue: less 50% of organs covered (1) | Heart colour: dark (1); pale (2)               |
| Intestine: abnormal, watery (1)                | Heart size: enlarged (1)                       |
| Stomach: abnormal, watery (1)                  |                                                |
